# Supplementary material
Source: HighWire-hosted journal article supplement (https://ijgc.bmj.com/content/29/2/377)
Supplement: inline-supplementary-material-2 [file inline-supplementary-material-2.pdf]

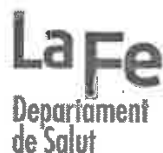

FPNT-07-07-EC (D)

## DICTAMEN DEL COMITÉ DE ÉTICA DE LA INVESTIGACIÓN CON MEDICAMENTOS

Don Serafín Rodríguez Capellán, Secretario del Comité de Ética de la Investigación con medicamentos del Hospital Universitario y Politécnico La Fe,

### CERTIFICA

Que este Comité ha evaluado la siguiente propuesta de ensayo clínico:

Código de protocolo del promotor: **SENTOV**

Nº EUDRACT: **2017-003683-12**

Título: **“SENTOV: GANGLIO CENTINELA EN CÁNCER DE OVARIO EN ESTADIO INICIAL.”**

Promotor: **INSTITUTO DE INVESTIGACION SANITARIA LA FE**

PROTOCOLO: **1.0/ 19 de septiembre de 2017**

HIP/CI: **1.0/ 19 de septiembre de 2017**

PROCEDIMIENTOS Y MATERIAL UTILIZADO PARA EL RECLUTAMIENTO DE LOS SUJETOS: **28 de noviembre de 2017**

Que este Comité ha realizado la evaluación de la parte I de la solicitud de autorización del ensayo, ha valorado las respuestas del promotor a las aclaraciones solicitadas (si las hubiera) y ha transmitido a la Agencia Española de medicamentos su opinión final sobre la parte I.

Que este Comité ha realizado la evaluación de la parte II de la solicitud de autorización del ensayo, de acuerdo con lo previsto en el Real Decreto 1090/2015 y en el art 7 del reglamento (UE) 536/2014 y considera que:

- El procedimiento para obtener el consentimiento informado (incluyendo las hojas de información al sujeto de ensayo y consentimientos informados mencionados en el encabezamiento), y el plan de reclutamiento de sujetos previsto son adecuados y cumplen con los requisitos para la obtención del consentimiento informado previstos en el capítulo II del Real Decreto 1090/2015.
- Las compensaciones previstas a los participantes son adecuadas, así como las previsiones de indemnización por daños y perjuicios que pueda sufrir el participante.
- El procedimiento previsto para el manejo de datos personales es adecuado.
- El uso futuro de las muestras biológicas obtenidas durante el ensayo se adecua a lo previsto en el Real Decreto 1716/2011.
- Para la realización del ensayo se consideran adecuados los centros e investigadores previstos en el anexo a este dictamen, teniendo en cuenta las declaraciones de idoneidad emitidas por el promotor y por los responsables de las instituciones correspondientes.

Que este Comité decidió emitir **DICTAMEN FAVORABLE** en la reunión celebrada el día 13 de diciembre de 2017 (acta nº 425).

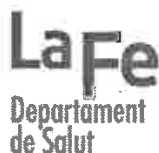

FPNT-07-07-EC (D)

Que en dicha reunión se cumplieron los requisitos establecidos en la legislación vigente – Real Decreto 1090/2015 – para que la decisión del citado CEIm sea válida.

Que el CEIm del Hospital Universitario y Politécnico La Fe, tanto en su composición como en sus procedimientos, cumple con las normas de BPC (CPMP/ICH/135/95) y con la legislación vigente que regula su funcionamiento, y que la composición del CEIm del Hospital Universitario y Politécnico La Fe es la indicada en el anexo I, teniendo en cuenta que en el caso de que algún miembro participe en el ensayo o declare algún conflicto de interés no habrá participado en la evaluación ni en el dictamen de la solicitud de autorización del ensayo clínico.

Lo que firmo en Valencia, a 13 de diciembre de 2017

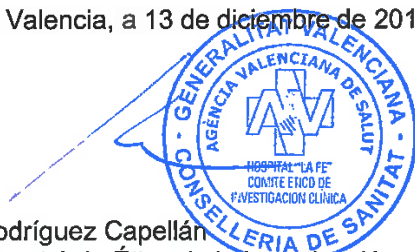

Fdo.: Serafín Rodríguez Capellán  
Secretario del Comité de Ética de la Investigación con medicamentos

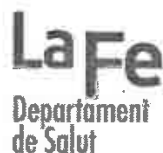

FPNT-07-07-EC (D)

## Anexo I Dictamen inicial sobre la Parte II COMPOSICION DEL CEIm

**Presidente:**

Dra. Adela Cañete Nieto (Oncología Pediátrica)

**Vicepresidente - Farmacólogo Clínico:**

Dr. Salvador Aliño Pellicer (Catedrático Farmacólogo Clínico)

**Secretario- Licenciado en Derecho:**

D. Serafín Rodríguez Capellán (Licenciado en derecho-Ajeno profesión sanitaria)

**Miembros:**

Dr. Luis Almenar Bonet (Cardiología)  
 Dra. Esther Zorio Grima (Cardiología)  
 Dr. Marino Blanes Juliá (Unidad de Enfermedades Infecciosas)  
 Dra. Inmaculada Calvo Penadés (Reumatología Pediátrica)  
 Dr. Bonaventura Casanova Estruch (Neurología)  
 Dr. José Vicente Castell Ripoll (Hepatología Experimental)  
 Dr. José Vicente Cervera Zamora (Hematología)  
 Dra. María José Gómez-Lechón Moliner (Investigadora del Grupo Acreditado en Hepatología Experimental)  
 Dra. M<sup>a</sup> Isabel Izquierdo Macián (Neonatología)  
 Dr. José López Aldeguez (Enfermedades Infecciosas)  
 Dr. Luis Vicente Martínez Dolz (Cardiología)  
 Dr. Javier Pemán García (Investigador del Grupo Acreditado multidisciplinar para el estudio de la Infección Grave)  
 Dr. Alfredo José Perales Marín (Ginecología y Obstetricia)  
 Dra. Paula Ramírez Gallego (UCI)  
 Dra. Pilar Sáenz González (Neonatología)  
 Dr. Máximo Vento Torres (Neonatología)  
 Dra. Begoña Polo Miquel (Gastroenterología y Nutrición Pediátrica)  
 Dra. Iratxe Zarragoikoetxea Jauregui (Anestesia y Reanimación)  
 Dra. Sara Brugger Frigols (Radiodiagnóstico)  
 Dra. Eugenia Pareja Ibars (Cirugía General y Aparato Digestivo)  
 Dr. Jaime Sanz Caballer (Investigador del Grupo Acreditado en Hematología y Hemoterapia)  
 Dra. Pilar Sepúlveda Sanchis (Cardiología)  
 Dr. Felipe Querol Fuentes (Hemostasia y Trombosis)  
 Dra. Esperanza Ferrer Ferrandiz (Directora Escuela de Enfermería)  
 Dra. María Luisa Martínez Triguero (Análisis Clínicos)  
 Dra. María Tordera Baviera (Farmacéutica del Hospital)  
 Dr. Cesar Díaz Garcia (Reproducción - Miembro de la Comisión de Investigación)  
 Dr. Santiago Domingo Del Pozo (Oncología Ginecológica)  
 Dr. Enrique Viosca Herre (Medicina Física y Rehabilitación)  
 Dr. Joaquín Ernesto Hinojosa De Val (Medicina Digestiva - Hospital de Manises)  
 Dr. Rafael Botella Estrada (Dermatología)  
 Dra. María Ángeles Canós Verdecho (Unidad del Dolor)  
 Dña. Ana María Vivas Broseta (Directora de Enfermería)  
 Dña. María Victoria Paricio Gómez (Enfermería)  
 Dr. Oscar José Juan Vidal (Oncología Médica)  
 Dr. José María Canelles Gamir (Farmacéutico de Atención Primaria)  
 Dr. Jose Ivorra Cortes (Reumatología)  
 Dr. Matteo Frasson (Cirugía General y Aparato Digestivo)

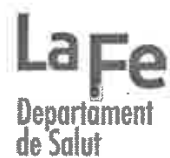

FPNT-07-07-EC (D)

Dr. José Vicente Solanas Prats (Atención Primaria)  
Dr. Oscar Díaz Cambroneró (Anestesia y Reanimación)  
Dña. Pilar Robles Villalba (Vicepresidenta de la asociación de Miastenia - Miembro ajeno a la profesión sanitaria)  
Dr. Javier Lluna González (Cirugía Pediátrica - Miembro del Comité de Ética Asistencial)  
Dra. Monica Almiñana Rique (Gerente del Dpto. de Salud Valencia La Fe)  
D. Miguel Ángel Cano Torres (Secretario de ASLEUVAL - Representante de los pacientes)

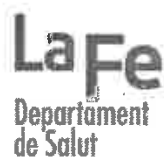

FPNT-07-07-EC (D)

**Anexo II Dictamen Inicial sobre la parte II**  
**CENTROS E INVESTIGADORES PRINCIPALES PARTICIPANTES EN ESPAÑA**

Código de protocolo del promotor: **SENTOV**

Nº EUDRACT: **2017-003683-12**

Título: **"SENTOV: GANGLIO CENTINELA EN CÁNCER DE OVARIO EN ESTADIO INICIAL."**

Promotor: **INSTITUTO DE INVESTIGACION SANITARIA LA FE**

| Investigador principal | Centro de realización del estudio          |
|------------------------|--------------------------------------------|
| Dr. Victor Lago Leal   | HOSPITAL UNIVERSITARIO Y POLITÉCNICO LA FE |
